# Supplementary material
Source: PubMed Central journal article supplement (PMC3039071)
Supplement: NIHMS261056-supplement-01.pdf [file NIHMS261056-supplement-01.pdf]

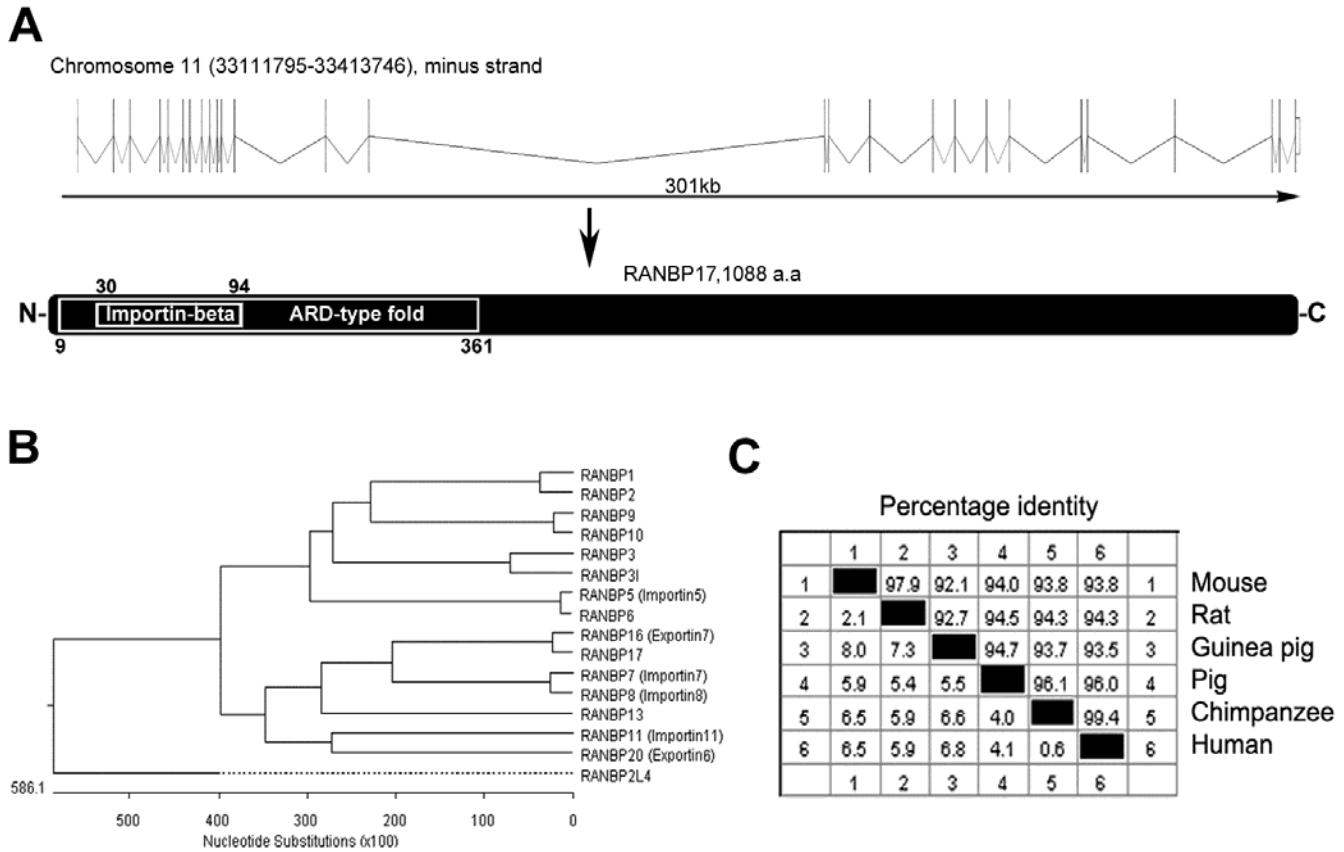

**Supplemental Figure 1.** Genomic structure, functional domains, and evolutionary conservation of RANBP17. **A)** RANBP17 is encoded by a gene (*Ranbp17*) which consists of 28 exons and is located on the reverse strand of chromosome 11. The 1088 a.a. RANBP17 contains two conserved functional domains: importin- $\beta$  and armadillo (ARD)-type fold in its N-terminus. **B)** The phylogenetic tree of 16 mouse Ran-binding protein paralogs. **C)** Amino acid sequence conservation among 6 mammalian orthologous RANBP17. Humans and mice display ~93.8% sequence identity in this protein.

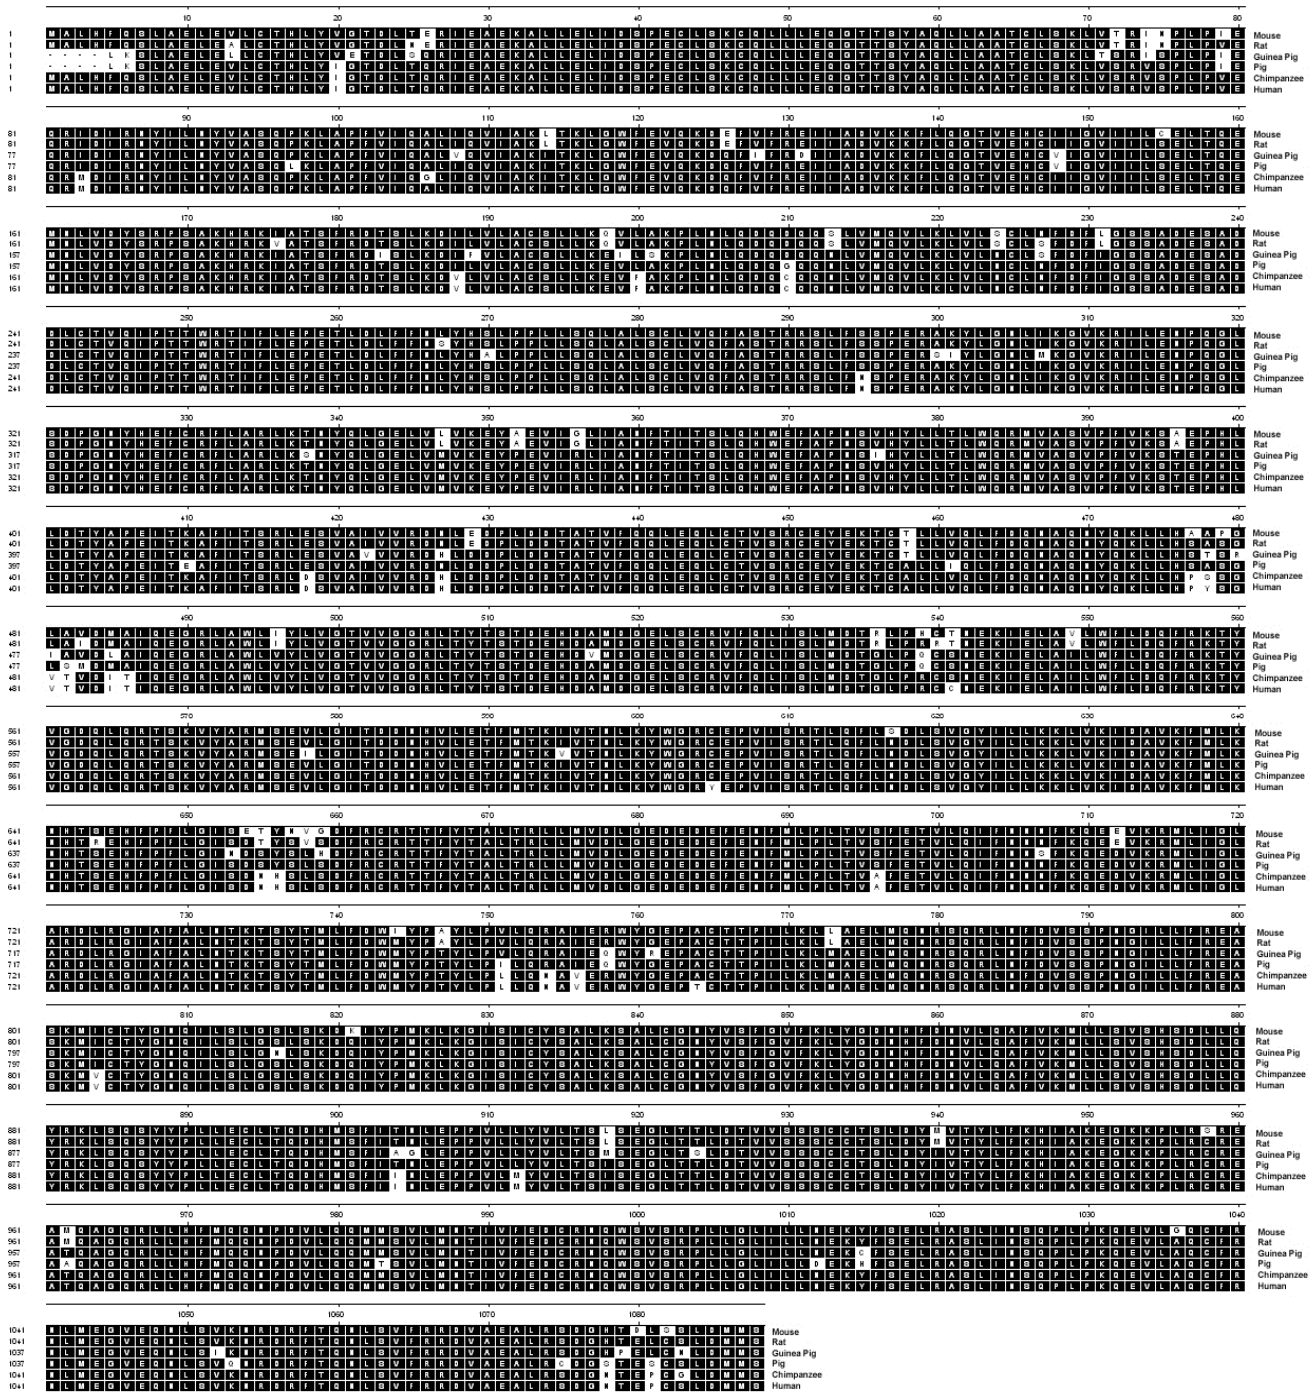

**Supplemental Figure 2.** Multiple alignment analyses of 6 mammalian RANBP17 orthologs. Conserved residues are shaded in black.

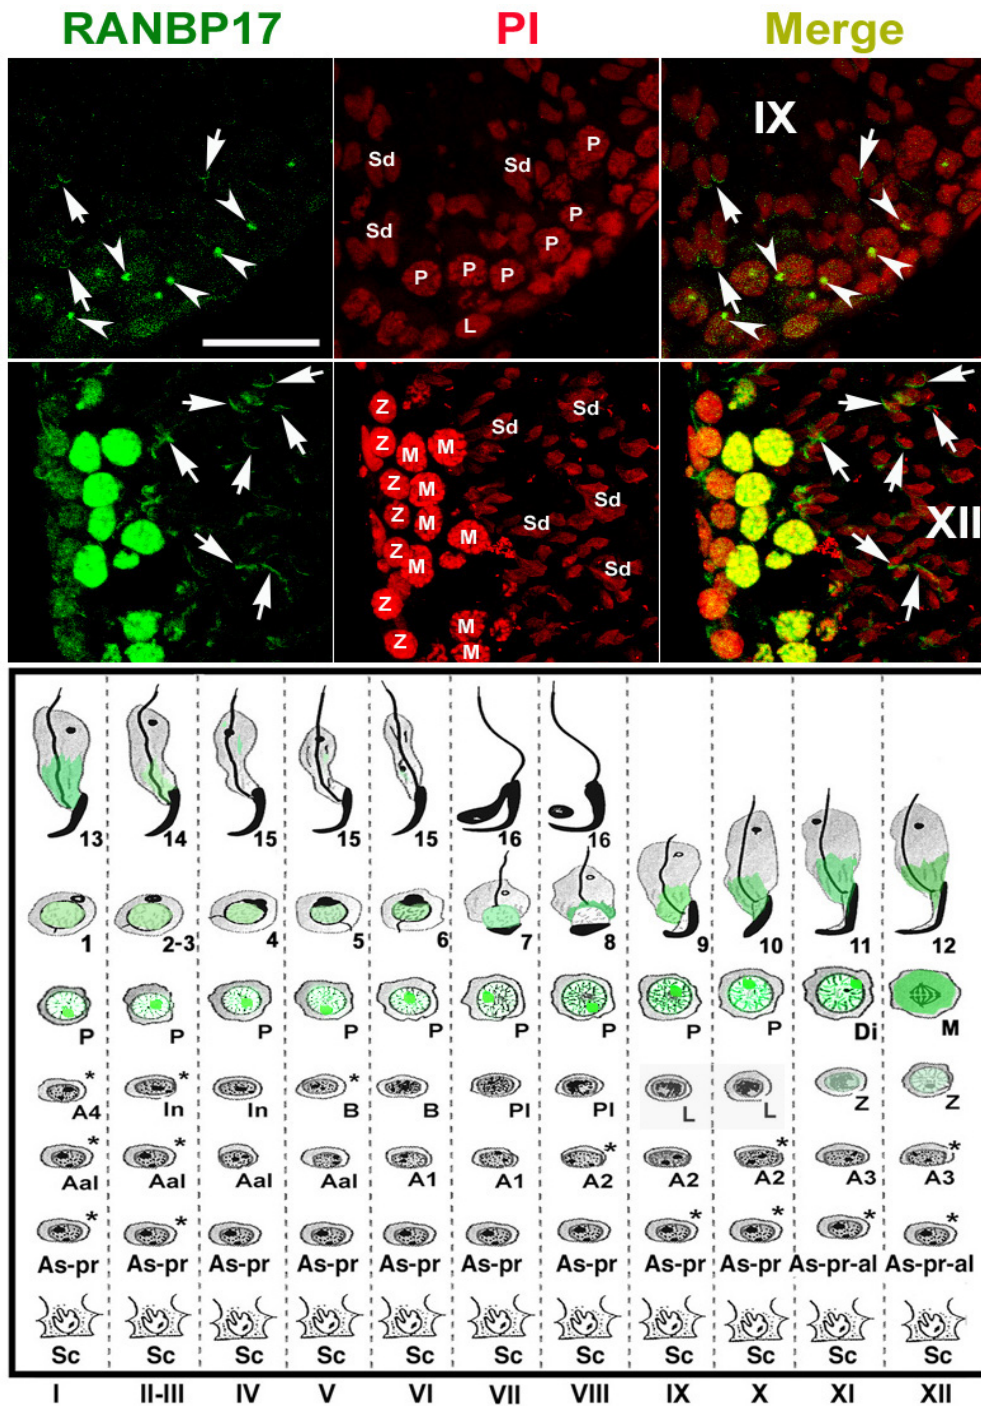

**Supplemental Figure 3.** High-power confocal images (upper 6 panels) showing RANBP17 localization to the XY body in pachytene spermatocytes and to the manchette in step 12 spermatids in adult mouse testes. All upper 6 panels are in the same magnification and the scale bar represents 20 $\mu$ m. The subcellular localization of RANBP17 during spermatogenesis is schematically summarized in the lower panel (painted in green). Roman numerals indicate stages of the seminiferous epithelial cycles. As, single type A spermatogonium; Apr, paired type A spermatogonium; Aal, Aligned type A spermatogonium; A1-4, type A1-A4 spermatogonium, B, type B spermatogonium, In, Intermediate spermatogonium; Pl, preleptotene spermatocyte; L, leptotene spermatocyte; Z, zygotene spermatocyte; P, pachytene spermatocyte; Di, diplotene spermatocyte; M, meiotically dividing spermatocyte; Arabic numbers indicate steps of developing spermatids.

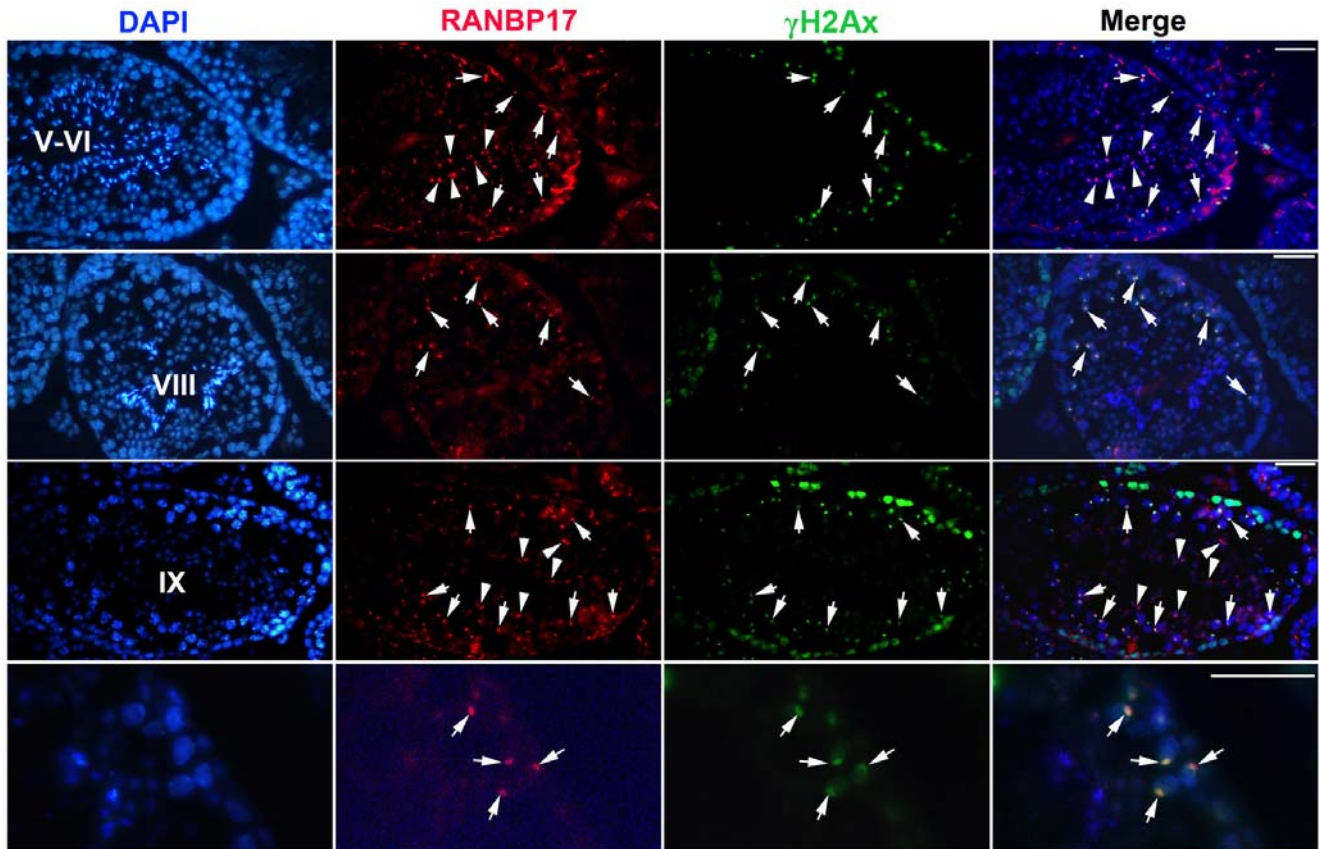

**Supplemental Figure 4.** Co-localization of RANBP17 and  $\gamma$ H2Ax to the XY body in pachytene spermatocytes. Red immunofluorescence represents the RANBP17 immunoreactivity and green for that of  $\gamma$ H2Ax. The nuclei were counter-stained with DAPI (blue). Arrows indicate the XY body in pachytene spermatocytes and arrowheads point to the manchette-like structure in elongating spermatids. Roman numerals indicate stages of the seminiferous epithelial cycles. Panels in the same row are in the same magnification and the scale bars represent 20 $\mu$ m.

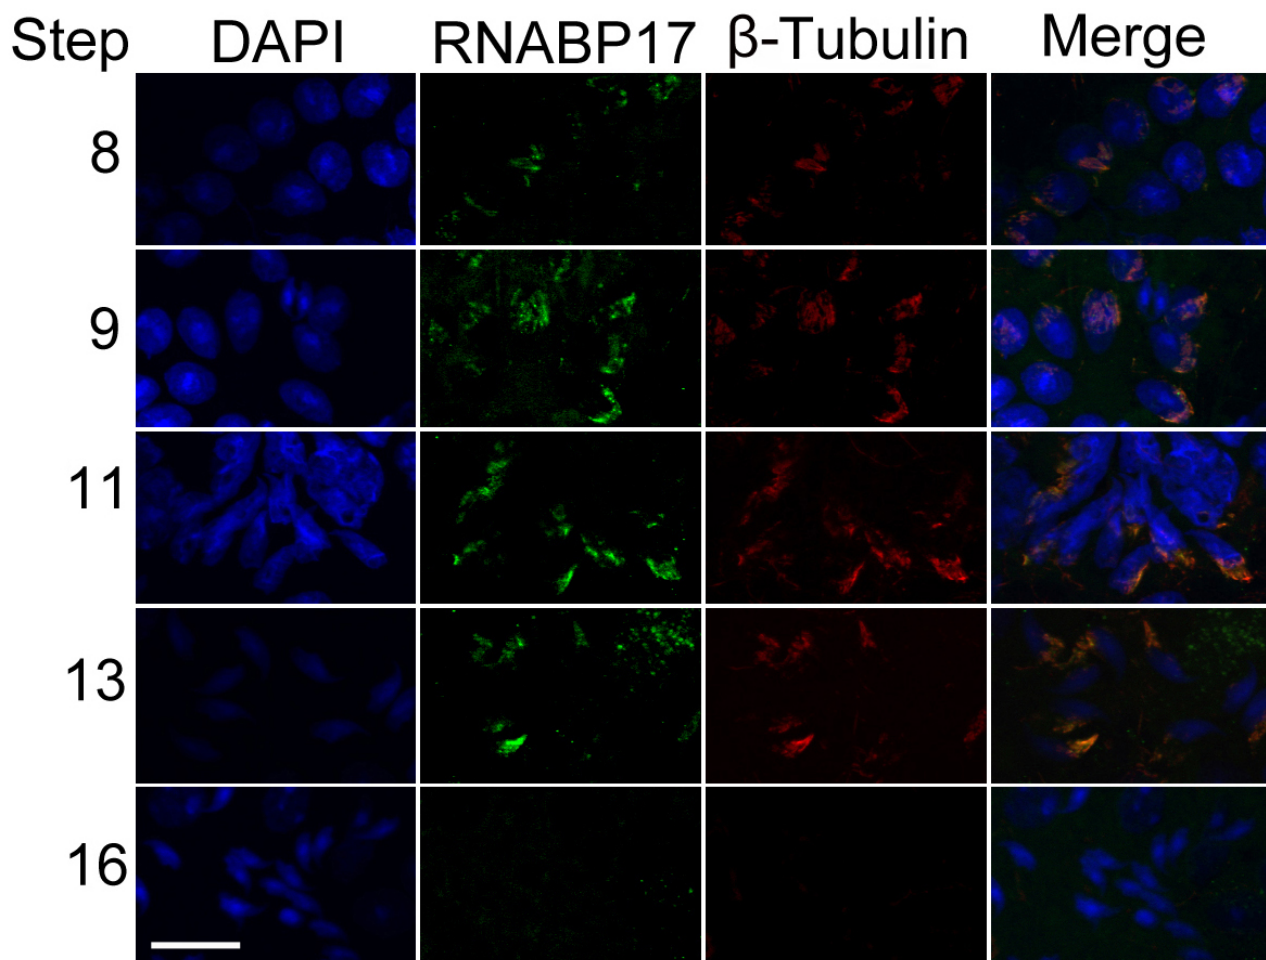

**Supplemental Figure 5.** RANBP17 and  $\beta$ -Tubulin remain localized to the manchette of *Spem1*-null elongating spermatids. Green fluorescence represents the RANBP17 immunoreactivity and red fluorescence indicates the immunoreactivity of  $\beta$ -Tubulin, a marker for the manchette. Cell nuclei were counterstained using DAPI (blue). Note that the patchy and uneven-looking of both RANBP17 and  $\beta$ -Tubulin immunofluorescent signals in *Spem1*-null manchette comparing to their smooth and even staining patterns of the wild-type manchette shown in Figs. 5 and 6. Arabic numbers on the left stand for steps of the developing spermatids. All panels are in the same magnification. Scale bar = 20 $\mu$ m.
